# Supplementary material
Source: publisher site journal article supplement (https://www.e-cmh.org/upload/media/cmh-2022-0205-Supplementary-Fig-7.pdf)
Supplement: Supplementary file 1 [file cmh-2022-0205-Supplementary-Fig-7.pdf]

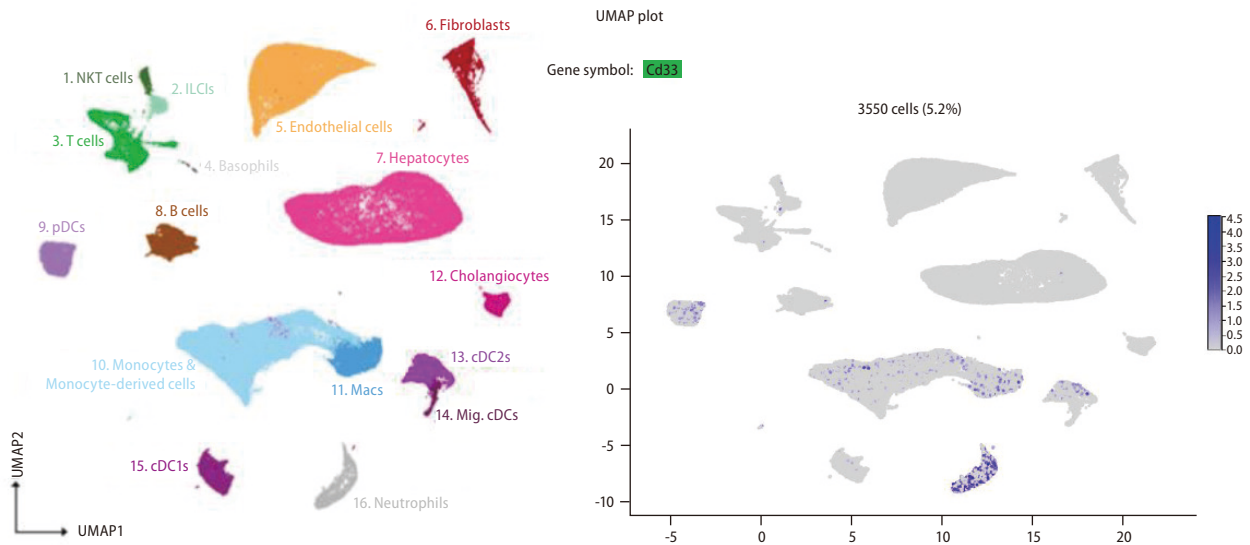

**Supplementary Figure 7.** Presence of Cd33<sup>+</sup> cells in the liver from Liver Cell Atlas ([https://www.livercellatlas.org/datasets\\_NAFLDmouse.php](https://www.livercellatlas.org/datasets_NAFLDmouse.php)). Plots were derived from a mouse model of NASH through cellular indexing of transcriptomes and epitopes by sequencing (CITEseq) analysis of immune cells isolated from the livers of mice fed on Western diet.
